# Supplementary material for: A prognostic index based on a fourteen long non-coding RNA signature to predict the recurrence-free survival for muscle-invasive bladder cancer patients
Source: Springer Nature journal article supplement (doi:10.1186/s12911-020-1115-2), 2020-07-01

C17orf65

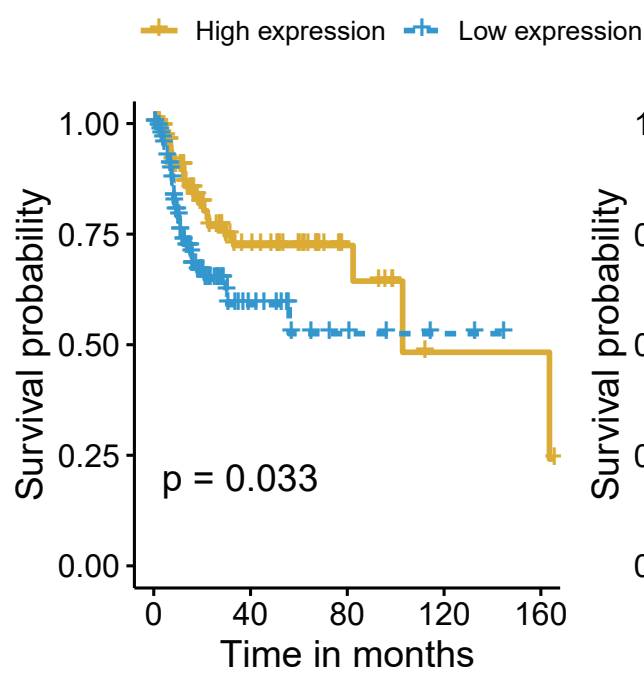

C22orf45

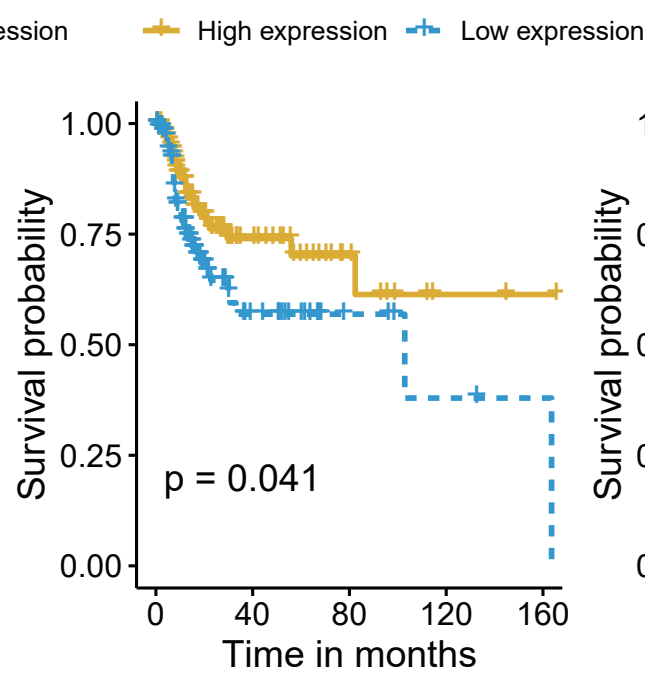

C7orf13

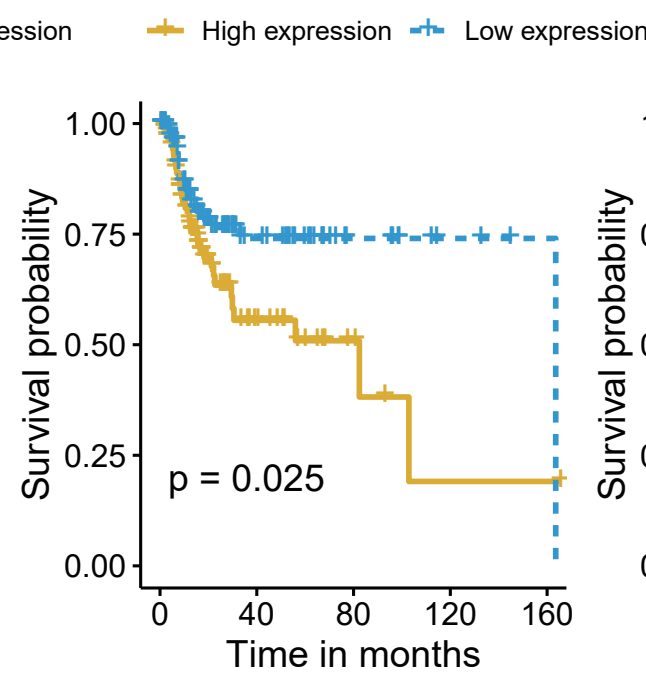

CACNA2D1

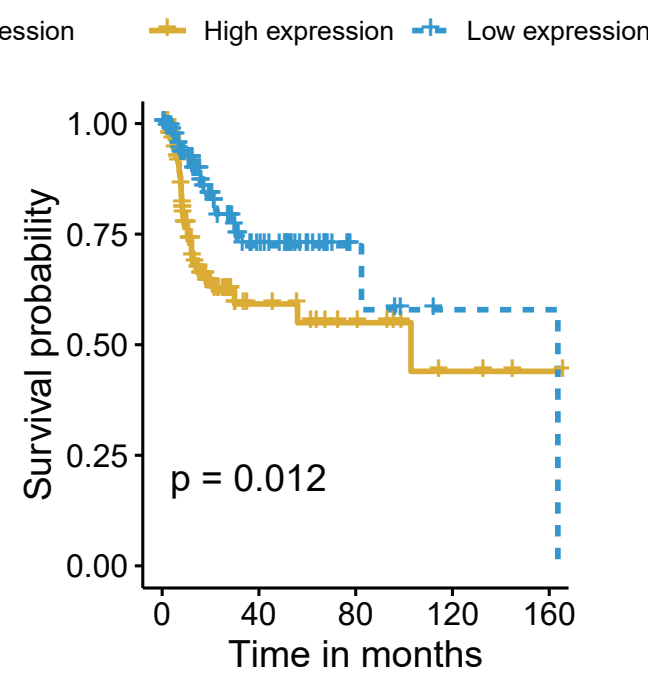

C21orf34

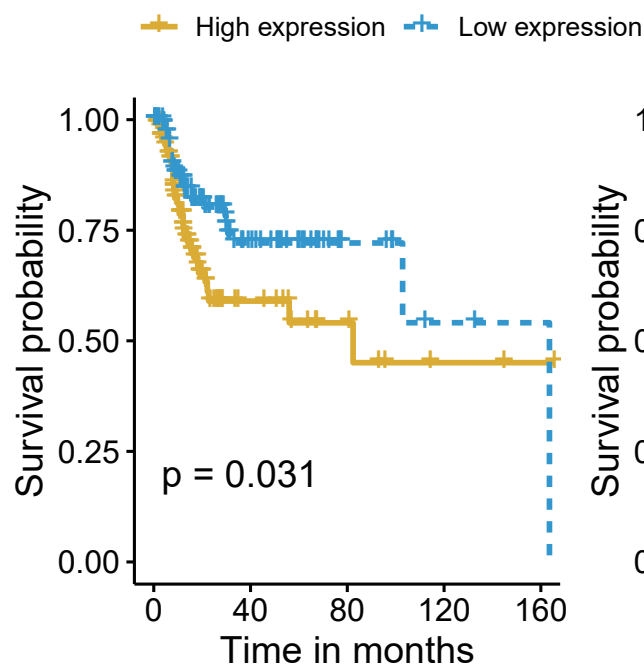

C4orf12

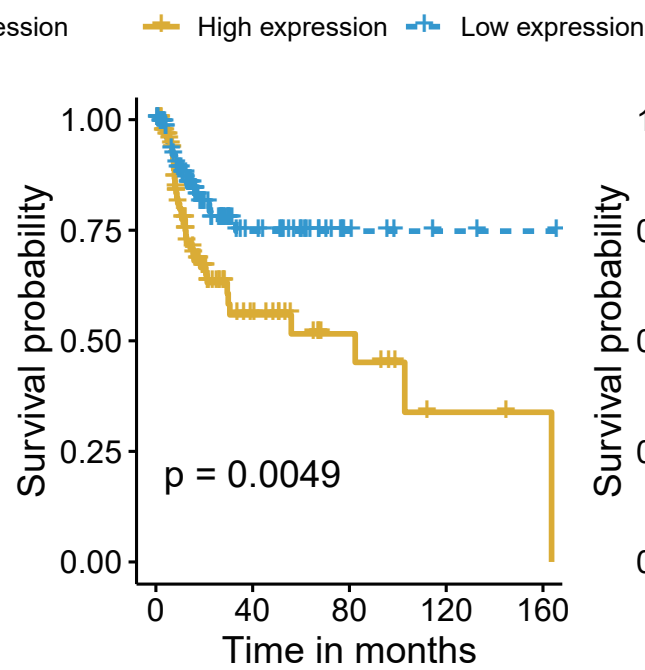

C8orf77

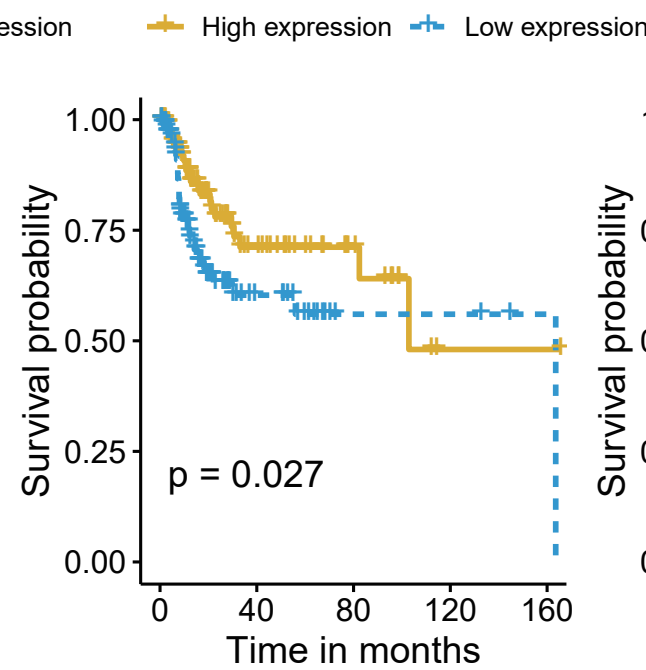

CHKB-CPT1B

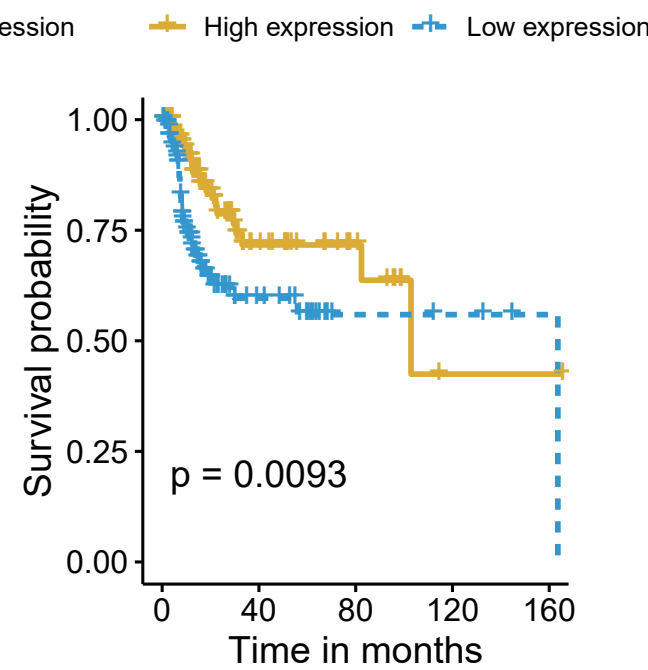

HCG4P6

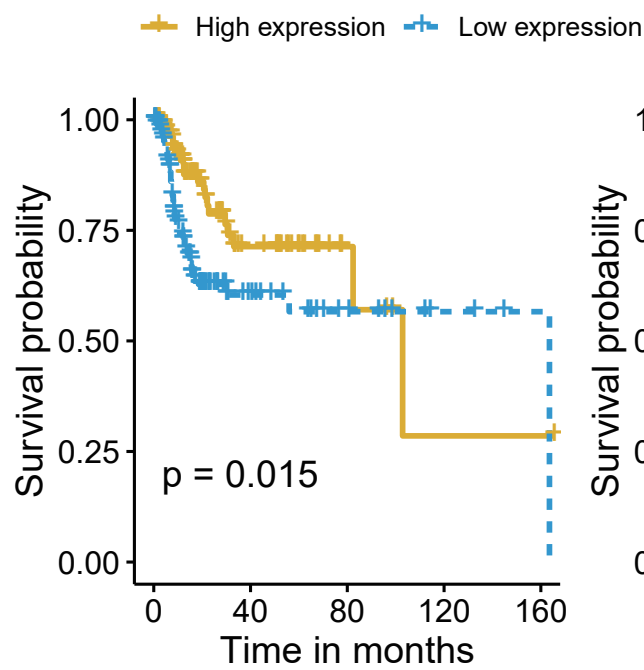

LOC100133991

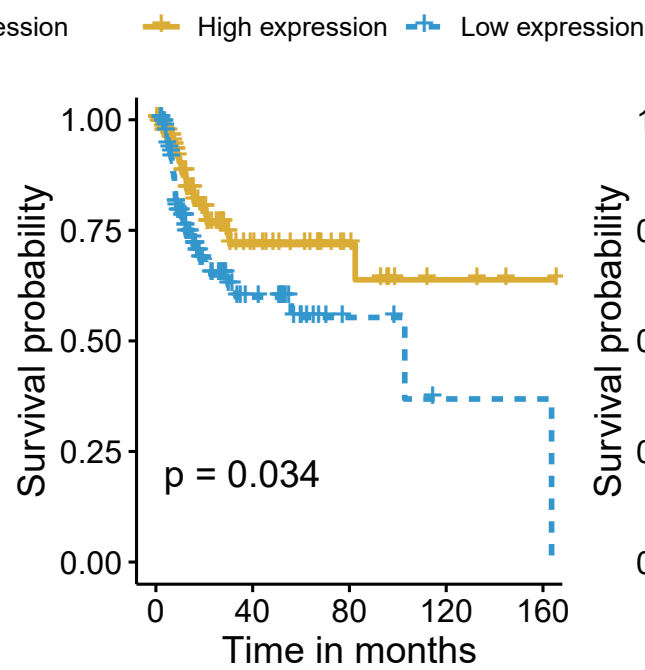

LOC283663

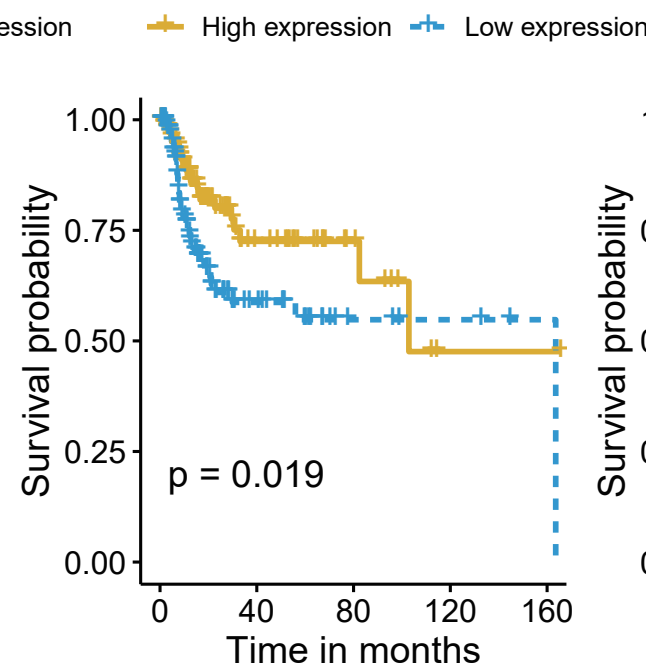

LOC285419

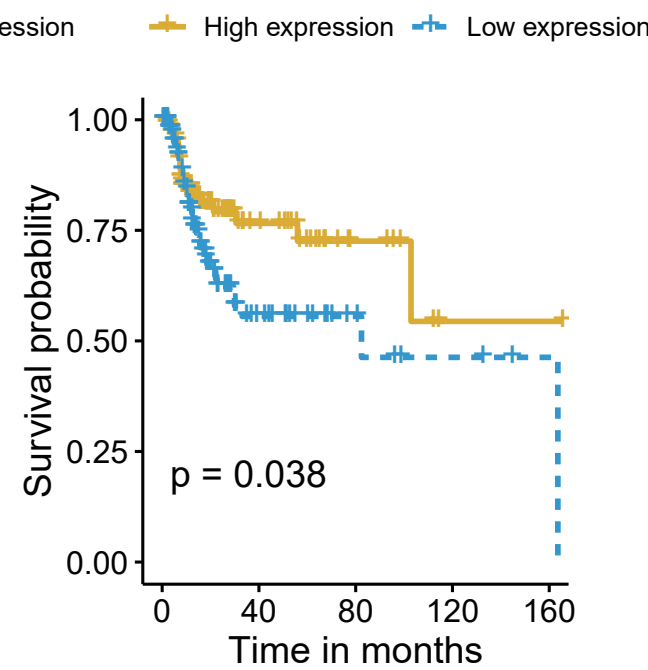

INE2

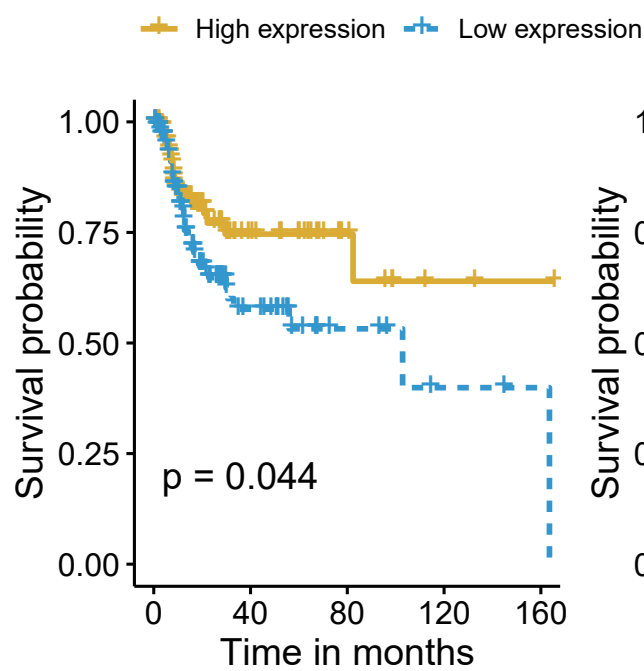

LOC115110

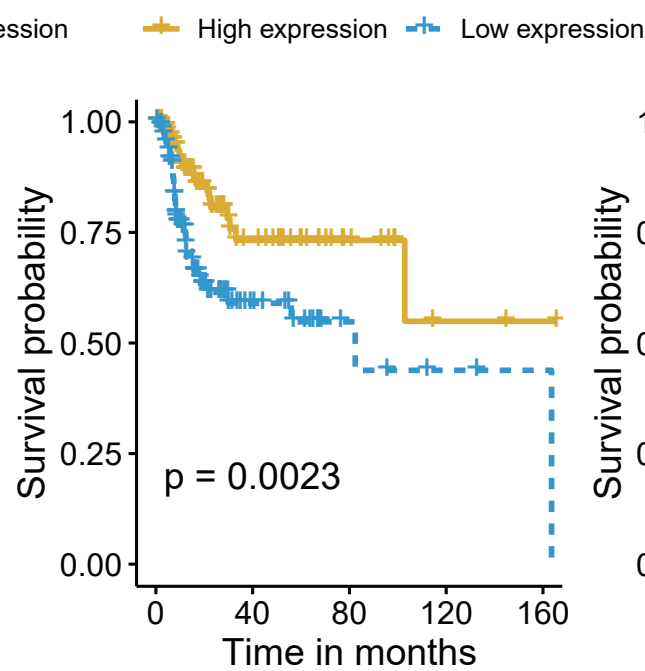

LOC284837

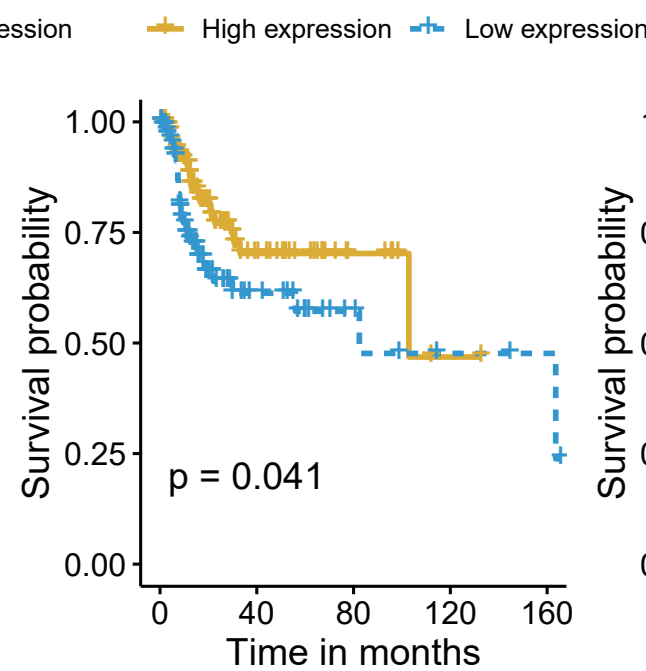

LOC554202

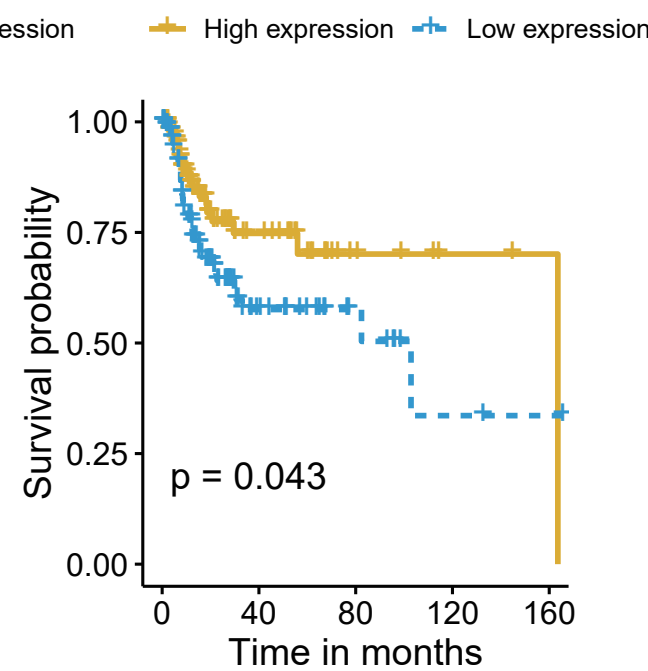

NCRNA00107

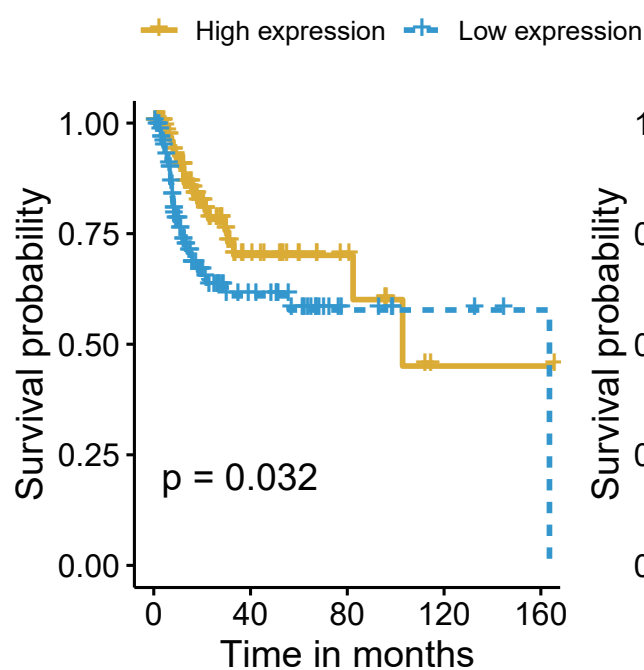

SNHG10

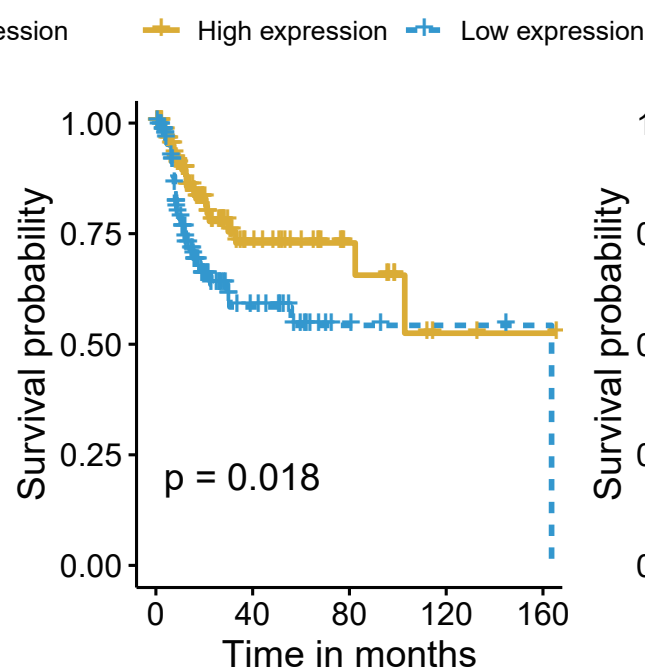

STL

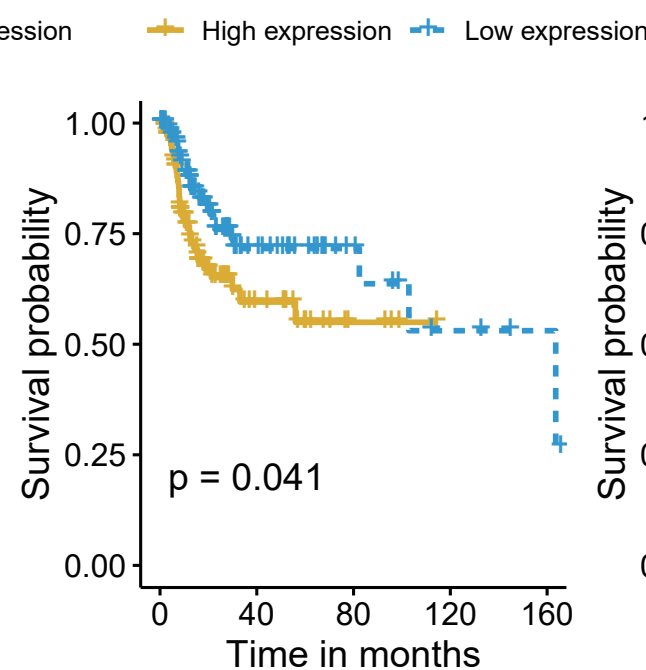

UCA1

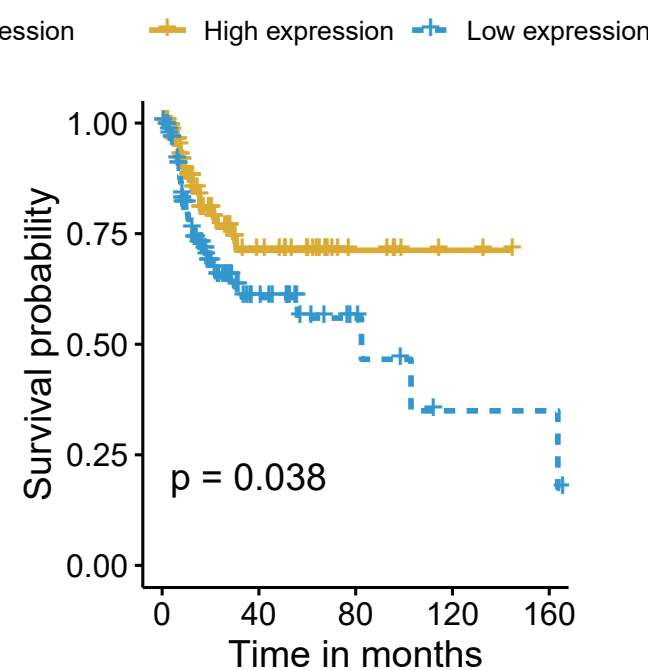

PAR5

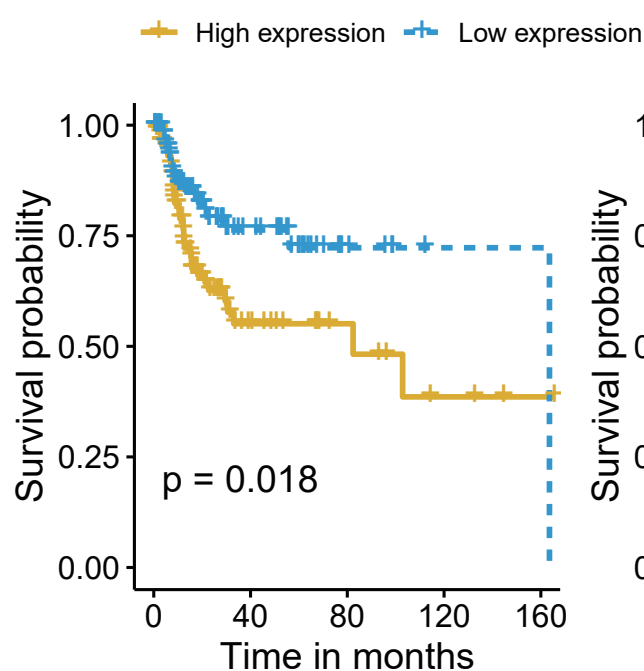

SOX2OT

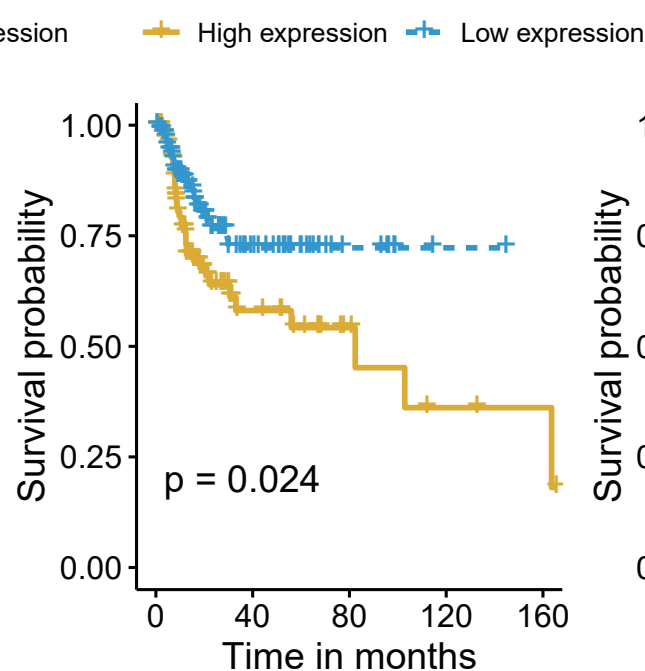

SYS1-DBNDD2

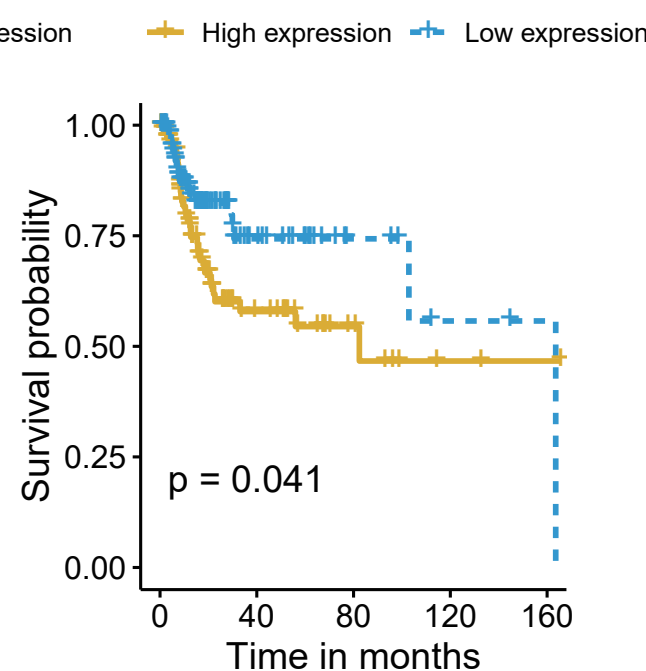

Supplement: MOESM1 [file 18163404]
