# Supplementary material for: A prognostic index based on a fourteen long non-coding RNA signature to predict the recurrence-free survival for muscle-invasive bladder cancer patients
Source: Springer Nature journal article supplement (doi:10.1186/s12911-020-1115-2), 2020-07-01

High\_risk Low\_risk

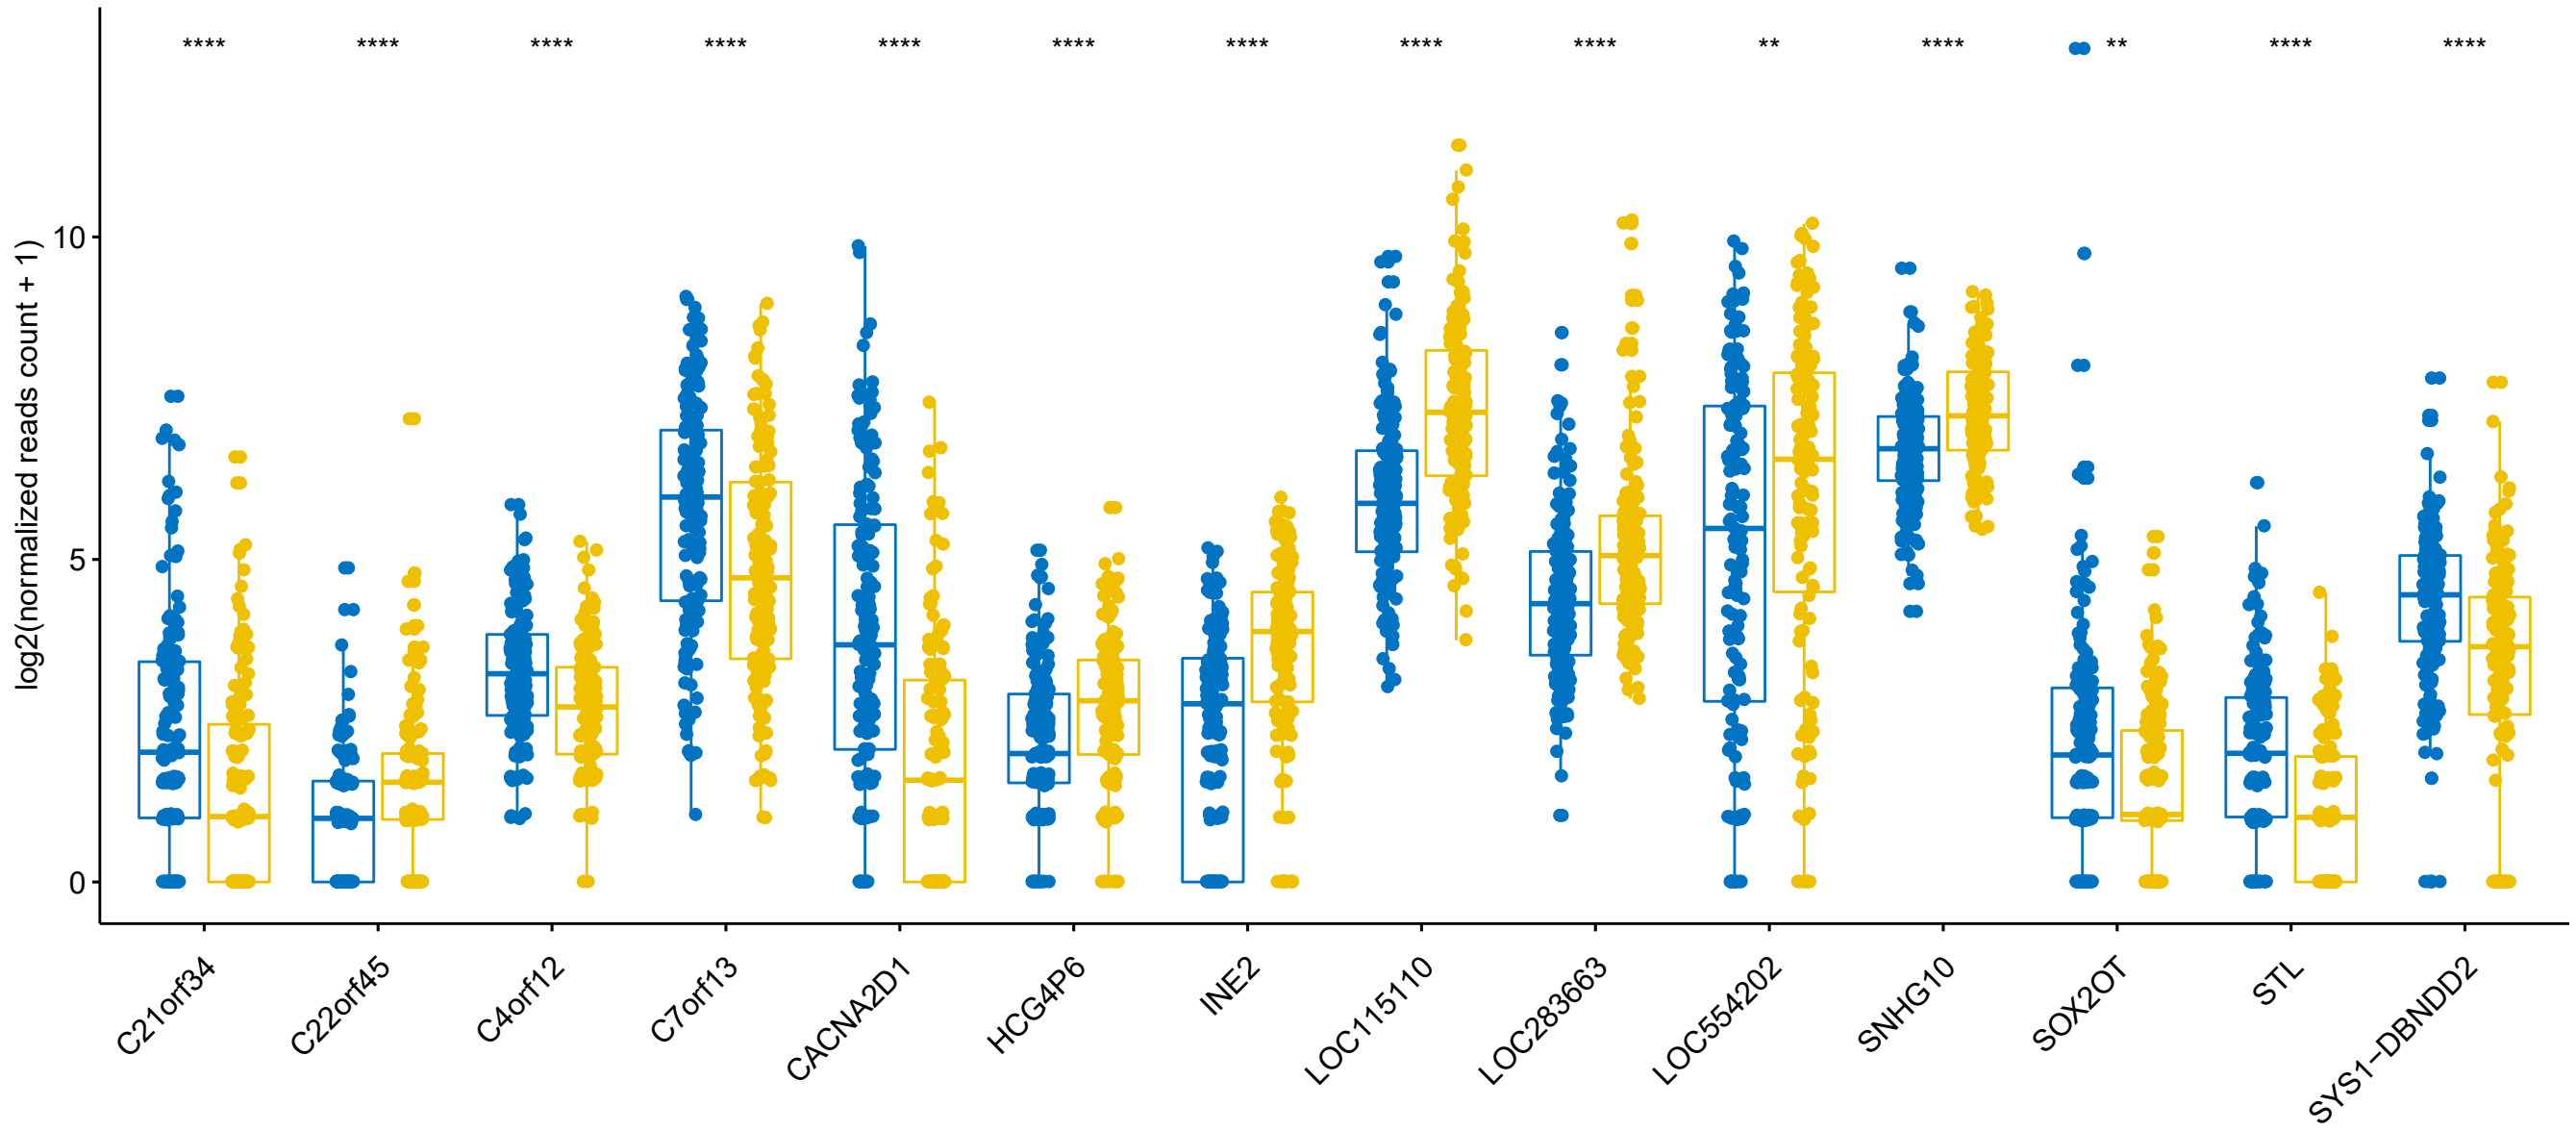

Supplement: MOESM2 [file 18163404]
